# Supplementary figures and images for: Causal manipulation of functional connectivity in a specific neural pathway during behaviour and at rest
Source: eLife journal article supplement (doi:10.7554/elife.04585), 2015-02-09

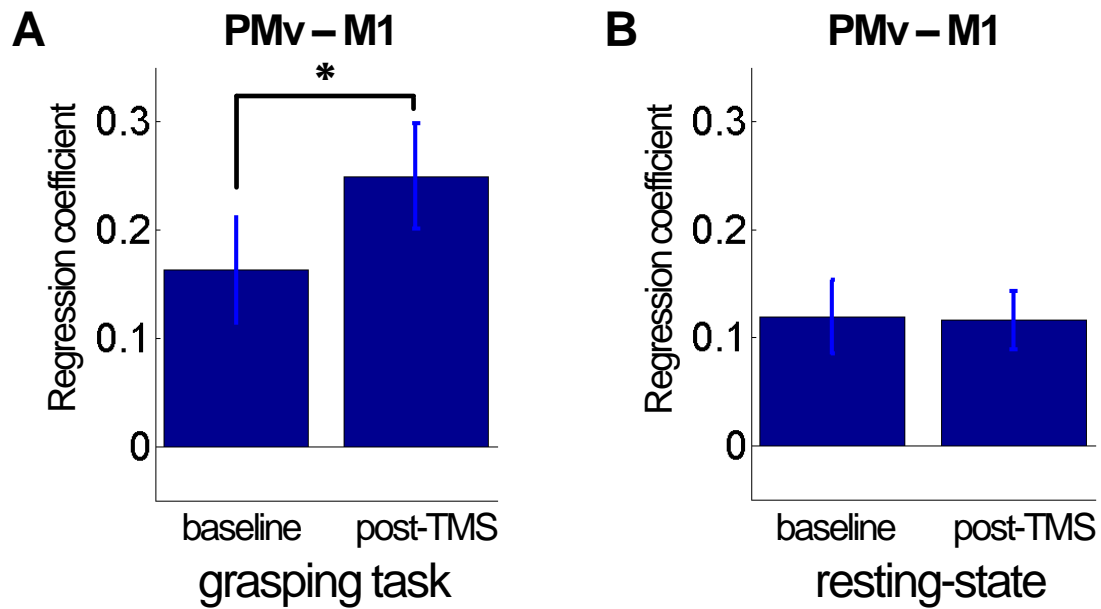

Supplement: supp [file elife_poa_e04585_Figure_2_Figure_supplement_1.pdf › elife_poa_e04585_Figure_2_Figure_supplement_1.pdf]

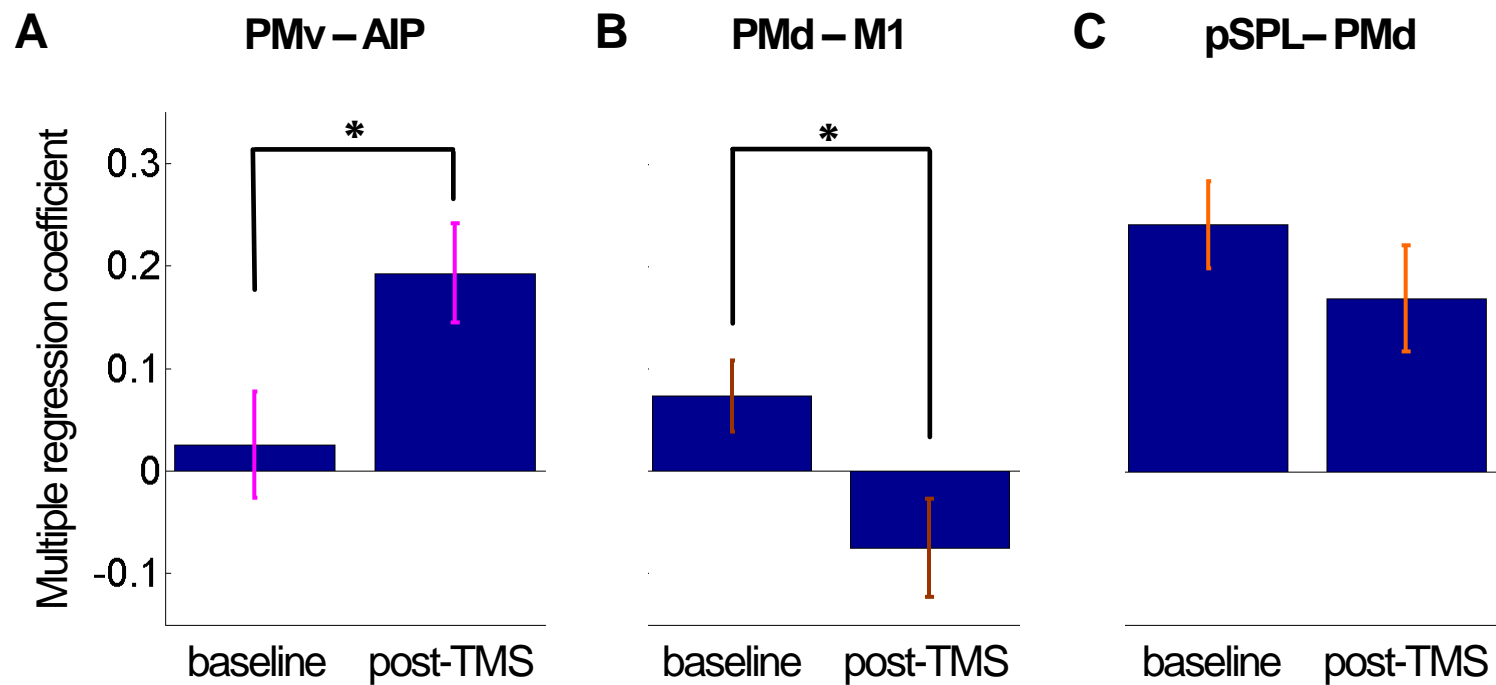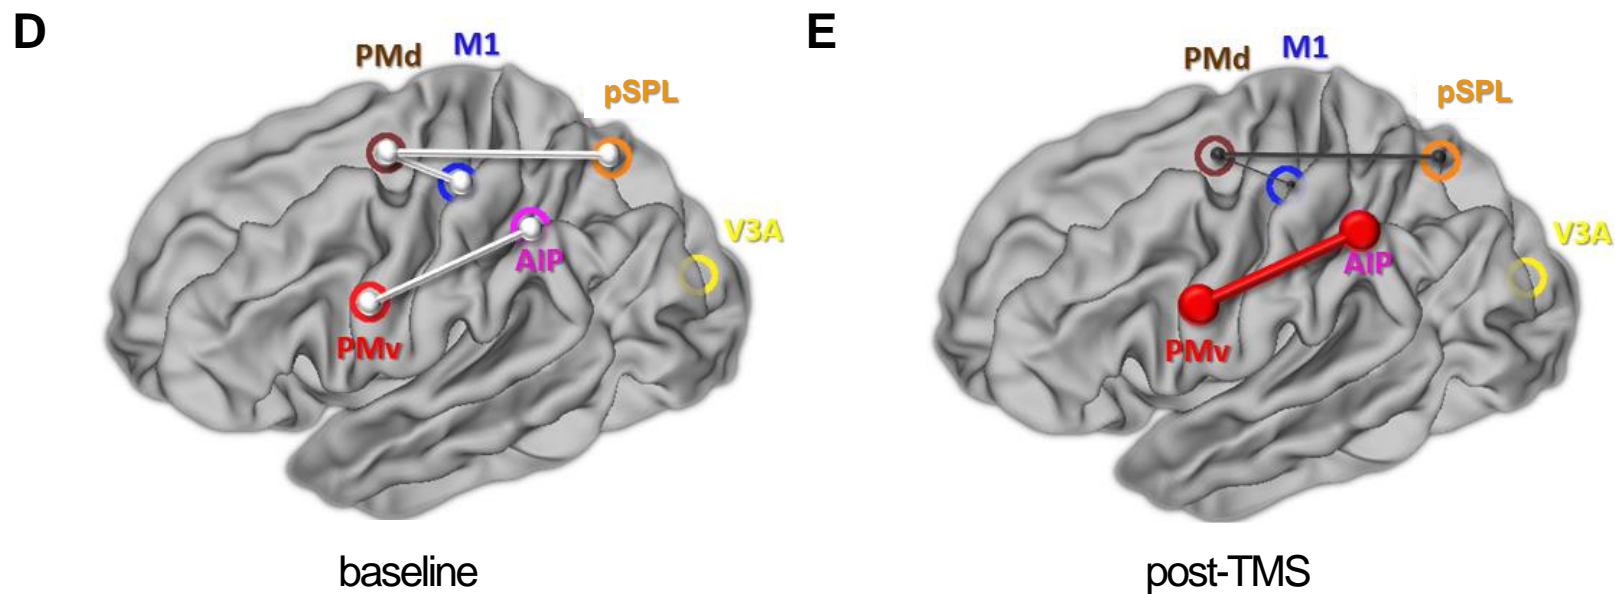

Supplement: supp [file elife_poa_e04585_Figure_3_Figure_Supplement_1.pdf › elife_poa_e04585_Figure_3_Figure_Supplement_1.pdf]

**A**

grasping task

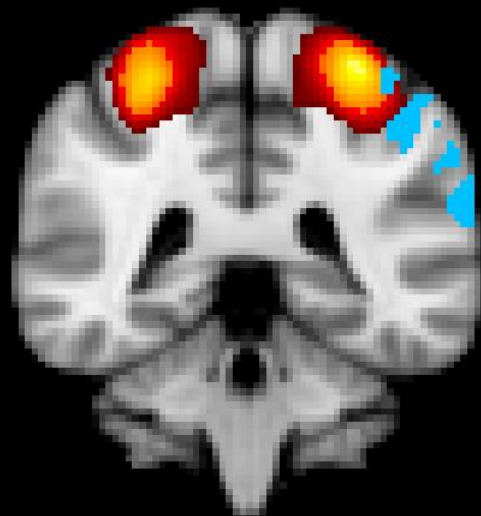 $y = -40$ 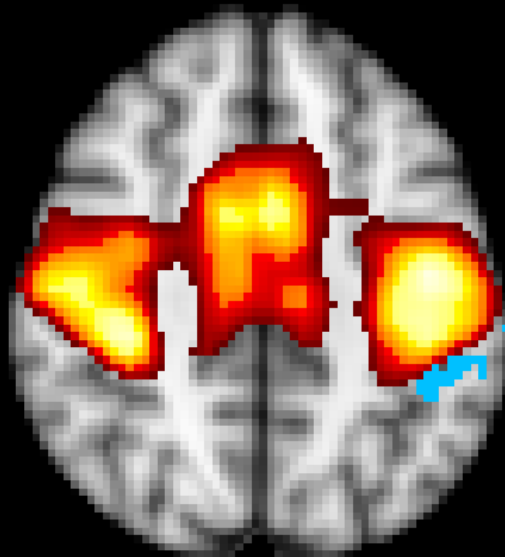 $z = 46$ **B**

resting-state

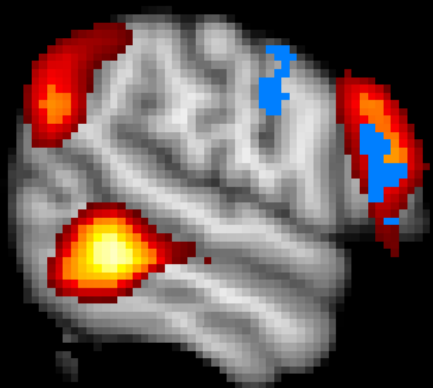 $x = -56$ 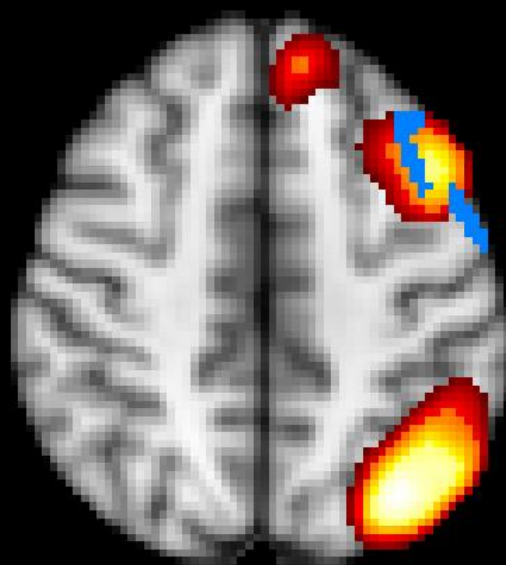 $z = 46$

Supplement: supp [file elife_poa_e04585_Figure_4_Figure_Supplement_1.pdf › elife_poa_e04585_Figure_4_Figure_Supplement_1.pdf]
